# Supplementary material for: A Qualitative Analysis of a Caregivers’ Experience of Complementary Feeding in a Population of Native Hawaiian, Other Pacific Islander and Filipino Infants: The Timing of the Introduction of Complementary Foods, and the Role of Transgenerational Experience
Source: MDPI journal article supplement (doi:10.3390/nu14163268), 2022-08-10
Supplement: s1 [file s1]

**Table S1:** Interview script of leading and follow-up questions used in in-depth interviews with Native Hawaiian and Other Pacific Islander, and Filipino caregivers,  $n = 29$ .<sup>a</sup>

| Interview Questions |                                                                                                                                                                                                                                                                                                                                                   |
|---------------------|---------------------------------------------------------------------------------------------------------------------------------------------------------------------------------------------------------------------------------------------------------------------------------------------------------------------------------------------------|
| 1.                  | Are you exclusively breastfeeding or not exclusively breastfeeding?                                                                                                                                                                                                                                                                               |
| 2.                  | Tell me about your childhood. <ul style="list-style-type: none"> <li>a. Where did you grow up?</li> <li>b. Who raised you?</li> <li>c. What were some cherished memories from your childhood?</li> <li>d. Tell me about what you ate growing up?</li> </ul>                                                                                       |
| 3.                  | What does a healthy baby look like? <ul style="list-style-type: none"> <li>a. How do you know if a baby is sick?</li> <li>b. What foods do you think are considered healthy for babies?</li> </ul>                                                                                                                                                |
| 4.                  | How did you learn about what to feed your baby? <ul style="list-style-type: none"> <li>a. Who are your <i>kumu</i> (teachers)?</li> <li>b. What are your <i>kumu</i>'s skills?</li> <li>c. Where are they from?</li> </ul>                                                                                                                        |
| 5.                  | What do you feed your baby? <ul style="list-style-type: none"> <li>a. How is your baby's food prepared? Mashed? Pureed? Pre-chewed?</li> <li>b. Who prepares your baby's food?</li> <li>c. Where do you get your baby's food?</li> </ul>                                                                                                          |
| 6.                  | Who do you go to for advice about feeding your baby? <ul style="list-style-type: none"> <li>a. Do you go to a doctor? Nurse? Parent expert? Family?</li> <li>b. If someone gave you advice would you follow it?<br/>Were roles determined by gender or age? Example: <i>Kūpuna</i> are always older than the baby.</li> </ul>                     |
| 7.                  | When did you feed your baby something other than milk? Milk being breastmilk, formula, condensed milk, cow's milk or any other kind of milk. <ul style="list-style-type: none"> <li>a. Was this different from what you were told to do?</li> </ul>                                                                                               |
| 8.                  | What are your earliest recollections about how baby(ies) were fed in your family? <ul style="list-style-type: none"> <li>a. What were the roles of other family members in feeding the baby?</li> <li>b. Were roles determined by age or gender?</li> </ul>                                                                                       |
| 9.                  | What ways of feeding babies have remained among your family? <ul style="list-style-type: none"> <li>a. In your family, how has the feeding of babies changed over time from your generation to the next?</li> </ul>                                                                                                                               |
| 10.                 | Through your life experiences how has your perception of feeding babies changed? <ul style="list-style-type: none"> <li>a. What in our community supports parents in serving traditional Hawaiian foods to their babies?</li> <li>b. What makes it difficult for parents who want to serve traditional Hawaiian foods to their babies?</li> </ul> |

<sup>a</sup> Shaded rows indicate the questions being analyzed in this study
